# Supplementary material
Source: PubMed Central journal article supplement (PMC2775313)
Supplement: 0905815106_0905815106SI.pdf [file 0905815106_0905815106SI.pdf]

# Supporting Information

Chang et al. 10.1073/pnas.0905815106

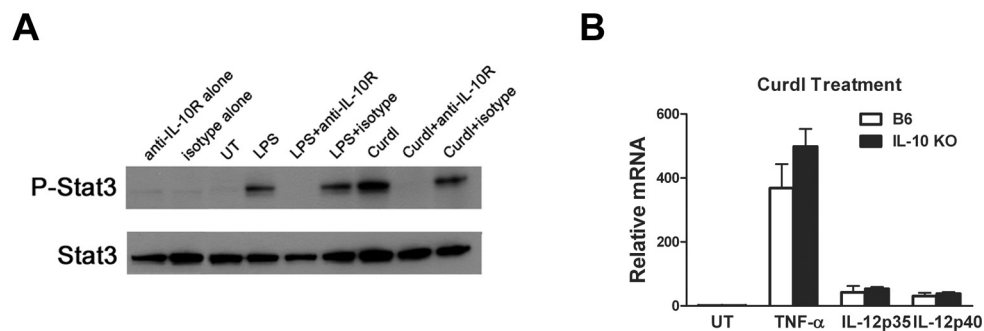

**Fig. S1.** Curdlan-mediated signaling pathway is not inhibited by IL-10. (A) Dendritic cells (DC) from C57BL/6 mice were treated as indicated for 6 h. Whole-cell lysates were prepared and Stat3 and P-Stat3 expression was analyzed by immunoblotting. (B) C57BL/6 and IL-10-deficient DC were treated with curdlan for 6 h. Quantitative (q)RT-PCR was performed to assess the amount of mRNA for TNF- $\alpha$ , IL-12p35, and IL-12p40. Values are presented as means  $\pm$  SD.

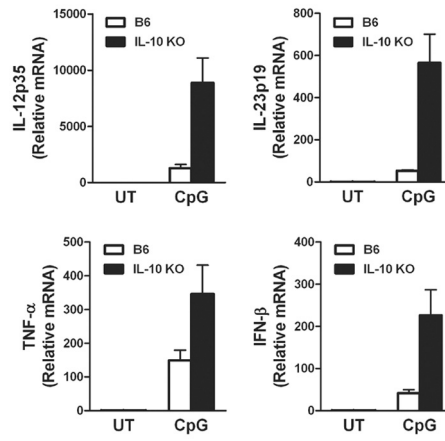

**Fig. S2.** IL-10 negatively regulates CpG signaling pathway. DC from C57BL/6 and IL-10-deficient mice were treated with CpG for 6 h, and qRT-PCR was performed to quantify IL-12p35, IL-23p19, TNF- $\alpha$ , and IFN- $\beta$  mRNA expression.

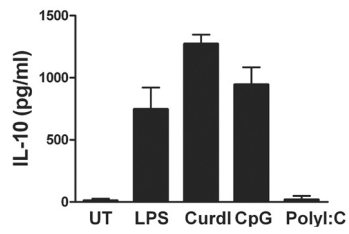

Fig. S3. IL-10 production by DC stimulated with various ligands. DC from C57BL/6 mice were stimulated as indicated for 24 h, and IL-10 level was measured by ELISA.

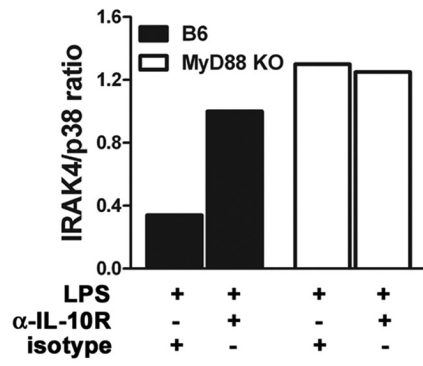

**Fig. 54.** IL-10 degraded IL-1 receptor-associated kinase (IRAK)4. Quantitation of IRAK4 protein levels at 48 h, measured by IRAK4/p38 ratio, was assessed by densitometric analysis using AlphaView (Alpha Innotech).

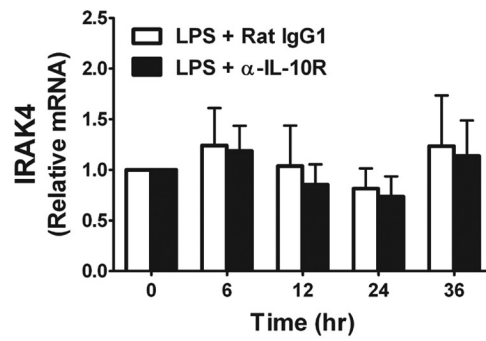

**Fig. S5.** The IRAK4 mRNA level was not affected by IL-10. DC from C57BL/6 mice were treated with 1  $\mu$ g/mL LPS with 15  $\mu$ g/mL rat IgG1 or with  $\alpha$ -IL-10R for the indicated time. Quantitative RT-PCR was performed to quantify IRAK4 mRNA levels. The primers used for IRAK4 was described previously (1). Values are presented as mean  $\pm$  SE.

1. Hatao F, et al. (2004) Prolonged Toll-like receptor stimulation leads to down-regulation of IRAK-4 protein. *J Leukoc Biol* 76:904–908.

**A**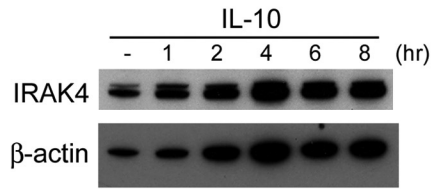**B**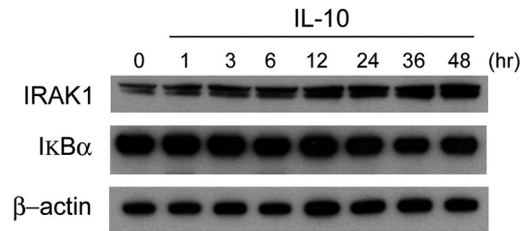

**Fig. S6.** Exogenous IL-10 could not induce protein degradation. DC from C57BL/6 mice were treated with 10 ng/mL of IL-10 for the indicated time. IRAK4 and  $\beta$ -actin (A) and IRAK1, I $\kappa$ B $\alpha$ , and  $\beta$ -actin (B) expression was analyzed by immunoblotting.

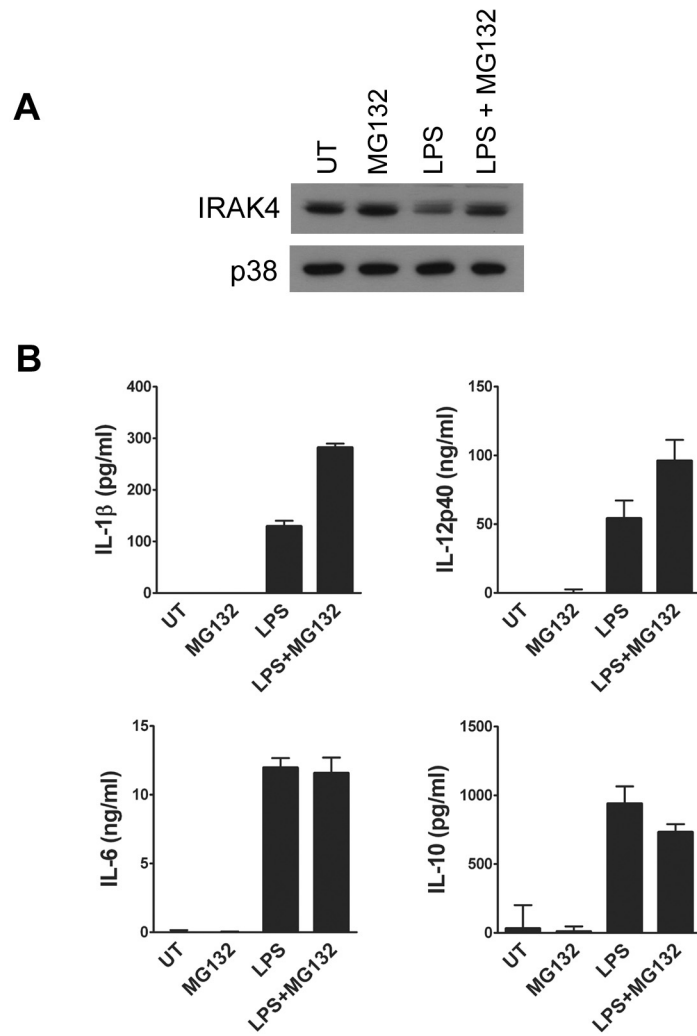

**Fig. S7.** MG132 alone does not enhance cytokine production. DC were treated with MG132 (0.5  $\mu$ M), LPS (1  $\mu$ g/mL), LPS together with MG132, or left untreated for 48 h. IRAK4 and p38 expression was analyzed at by immunoblotting (A); and IL-1 $\beta$ , IL-12p40, IL-6, and IL-10 proteins in the supernatants were quantified by ELISA (B).

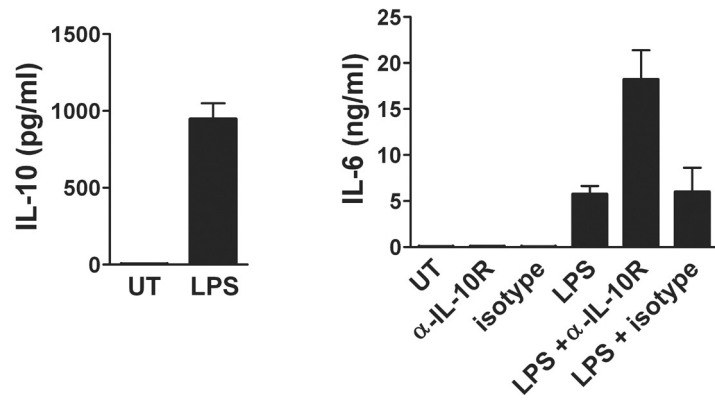

**Fig. S8.** RAW264.7 produced IL-10 on prolonged Toll-like receptor (TLR)4 stimulation. RAW264.7 cells were treated with LPS alone (1 μg/ml) or together with anti-IL-10R or rat IgG1 (both at 15 μg/ml) for 48 h. IL-10 and IL-6 levels were quantified by ELISA in culture supernatants.
